# Supplementary material for: Rotating 1-D magnetic photonic crystal balls with a tunable lattice constant
Source: Royal Society of Chemistry journal article supplement (doi:10.1039/c7nr03335d), 2017-01-01
Supplement: c7nr03335d1.pdf [file c7nr03335d1.pdf]

## Supporting Information

### Rotating 1-D Magnetic Photonic Crystal Balls with Tunable Lattice Constant

Wei Luo, Jindan Yan, Yali Tan, Huiru Ma\* and Jianguo Guan\*

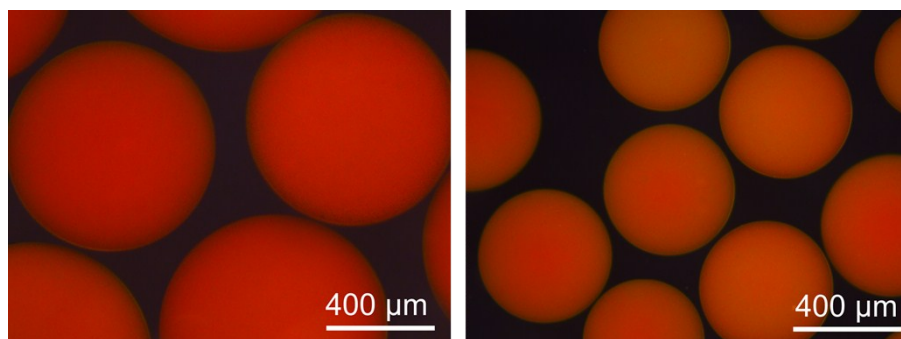

**Figure S1** Darkfield optical images of RPC balls with different diameters obtained by controlling injection volume of the syringe pump as (a) 0.4  $\mu\text{l}$  and (b) 0.05  $\mu\text{l}$ . The corresponding temperature in the images is 10  $^{\circ}\text{C}$ .
